# Supplementary material for: Formation mechanism and twist-angle dependent optical properties of bilayer MoS2 grown by chemical vapor deposition
Source: Royal Society of Chemistry journal article supplement (doi:10.1039/d0ce01788d), 2021-01-01
Supplement: d0ce01788d1.pdf [file d0ce01788d1.pdf]

**Formation Mechanism and Twist-angle Dependent Optical Properties of Bilayer MoS<sub>2</sub> Grown by Chemical Vapor Deposition**

Jinglei Han,<sup>a</sup> Fa Cao<sup>a</sup> and Xiaohong Ji<sup>\*a</sup>

a. School of Materials Science and Engineering, south China university of Technology, Guangzhou 510641, China.

\*E-mail: jxhong@scut.edu.cn





(a)

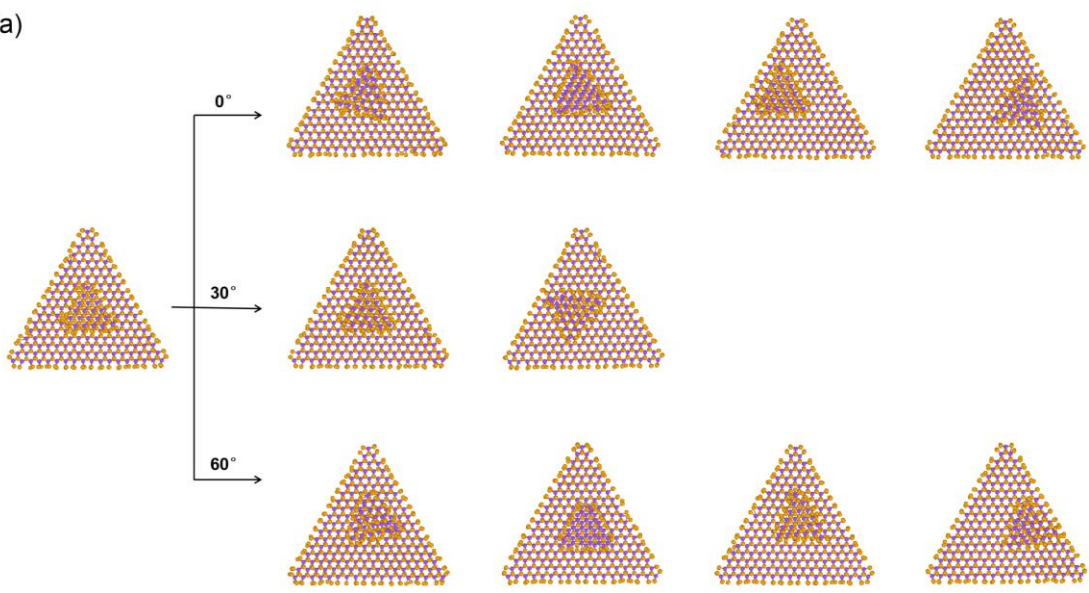

(b)

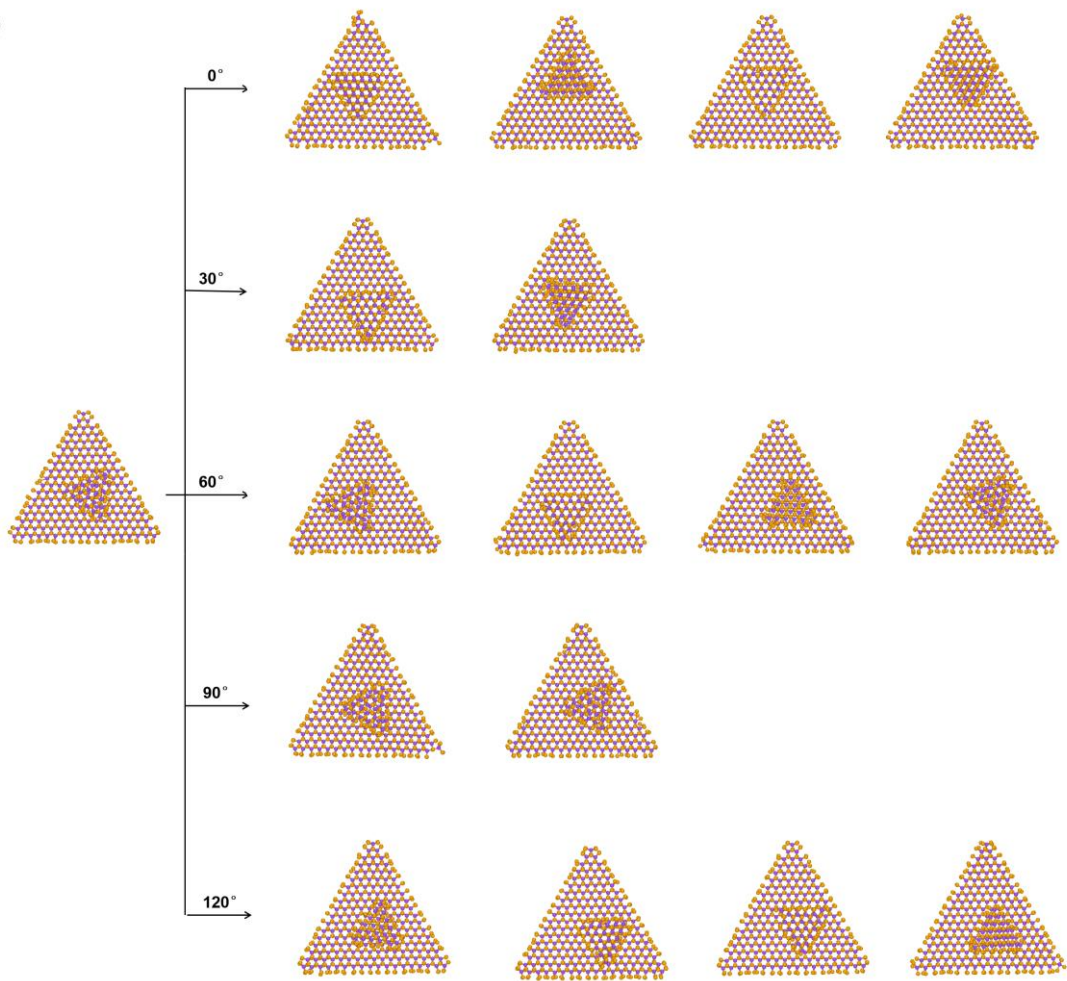

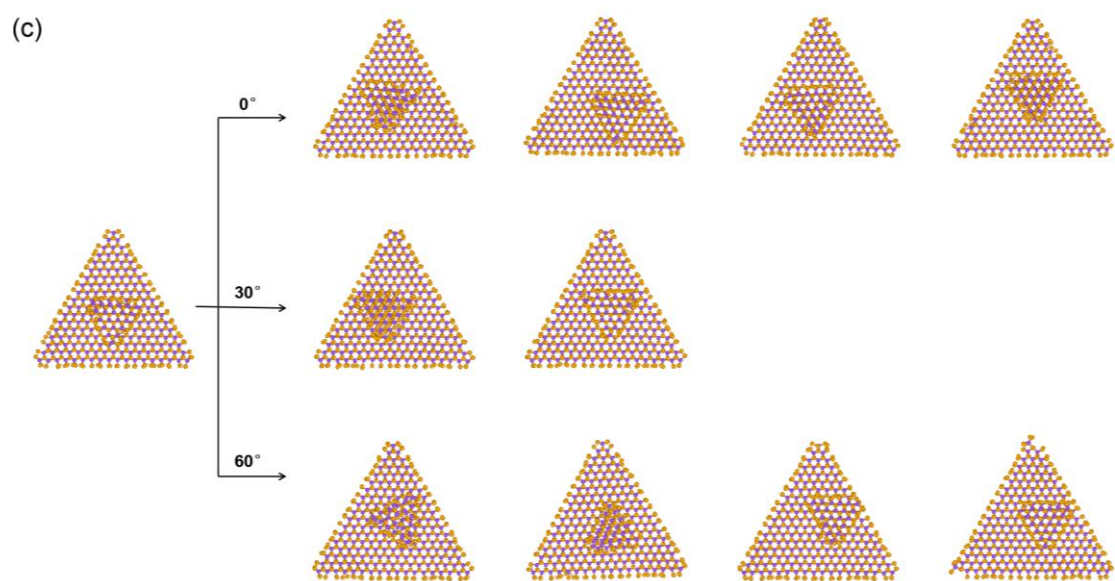

**Fig. S2.** The corresponding stacking configurations with twist angles of (a) 0°, (b) 30° and (c) 60° after fully relaxed at 300 K.

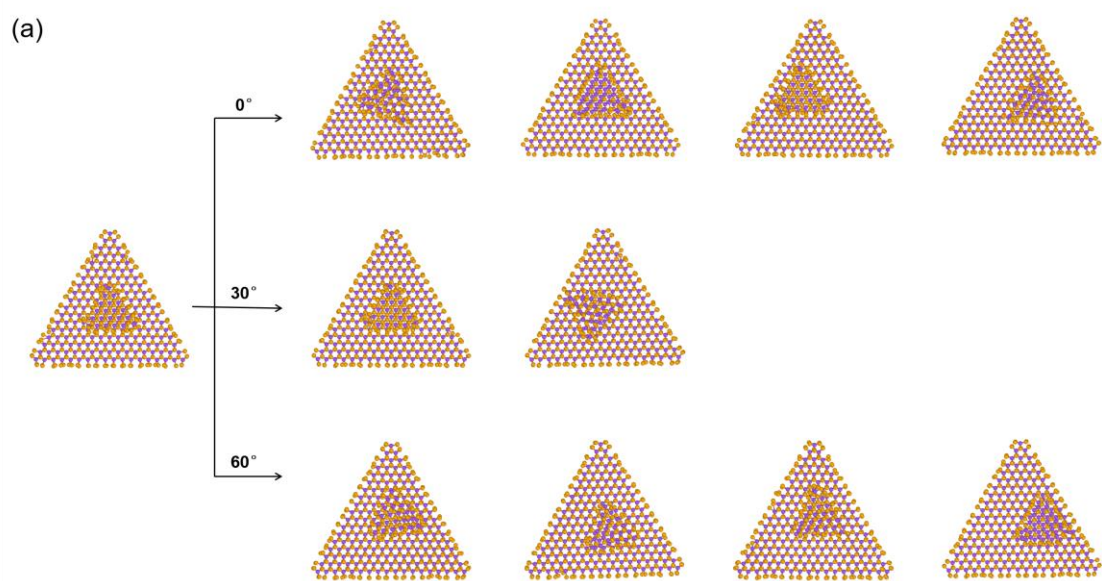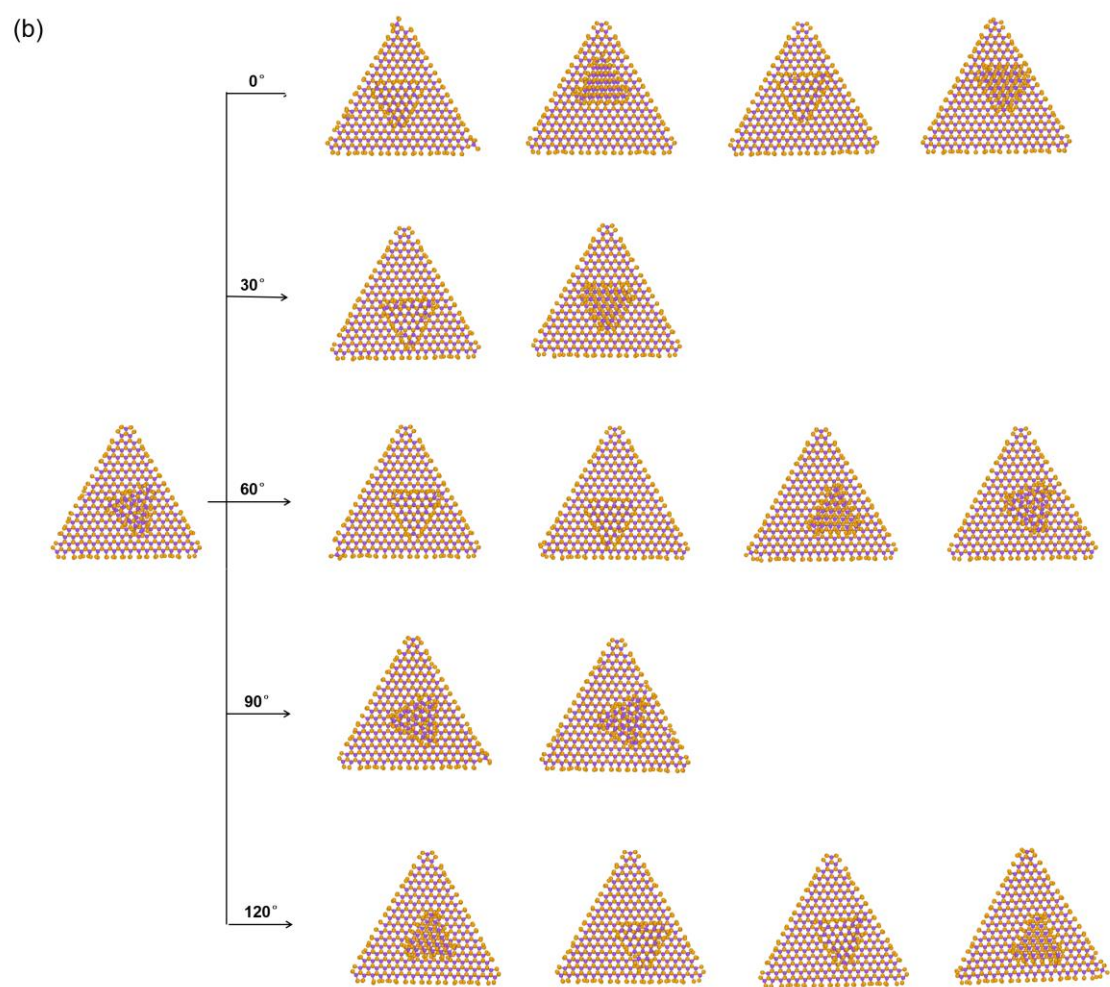

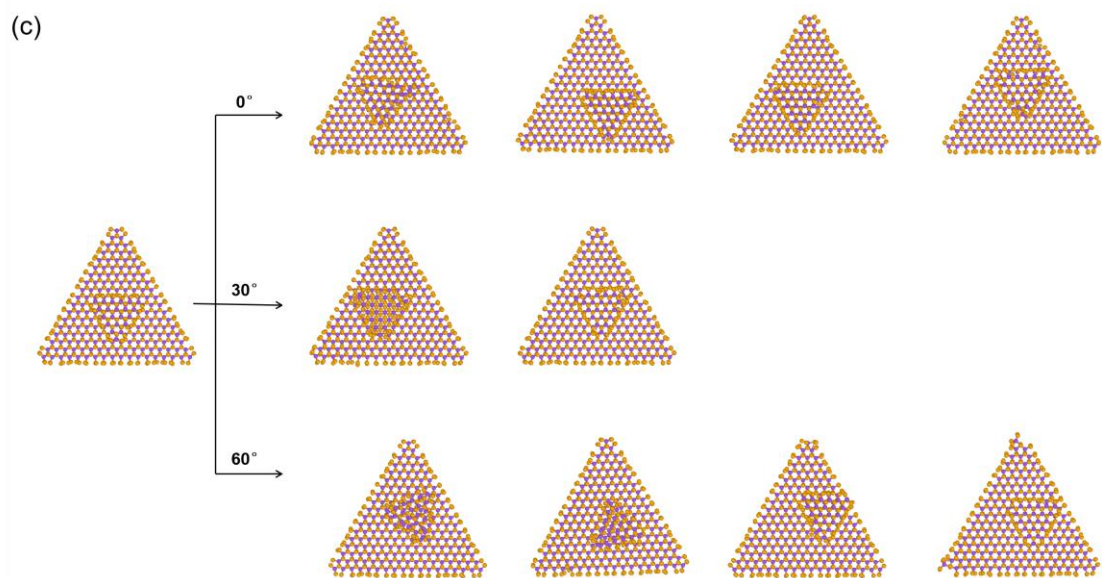

**Fig. S3.** The corresponding stacking configurations with twist angles of (a) 0°, (b) 30° and (c) 60° after fully relaxed at 0.3 K.

**Table S1** 0° stacking configurations simulated in our study at minimized state, 300 K and 0.3 K.

| 0° stacking configurations        | Minimized state | 300 K   | 0.3 K   |
|-----------------------------------|-----------------|---------|---------|
| Structure 1 (along 0° direction)  | AB stacking     | AB'     | AB'     |
| Structure 2 (along 0° direction)  | AB stacking     | twisted | twisted |
| Structure 3 (along 0° direction)  | AB stacking     | AB''    | AB''    |
| Structure 4 (along 0° direction)  | AB stacking     | AB'     | AB'     |
| Structure 5 (along 0° direction)  | AB stacking     | twisted | twisted |
| Structure 2 (along 30° direction) | AB stacking     | AB'     | AB'     |
| Structure 3 (along 30° direction) | AB stacking     | twisted | twisted |
| Structure 2 (along 60° direction) | AB stacking     | twisted | twisted |
| Structure 3 (along 60° direction) | AB stacking     | AB''    | AB''    |
| Structure 4 (along 60° direction) | AB stacking     | AB'     | AB'     |
| Structure 5 (along 60° direction) | AB stacking     | AB''    | AB''    |



**Table S2** 30° stacking configurations simulated in our study at minimized state, 300 K and 0.3 K.

| 30° stacking configurations        | Minimized state | 300 K   | 0.3 K   |
|------------------------------------|-----------------|---------|---------|
| Structure 1 (along 0° direction)   | AC stacking     | twisted | twisted |
| Structure 2 (along 0° direction)   | AC stacking     | AA'     | AA'     |
| Structure 3 (along 0° direction)   | AC stacking     | AB'     | AB'     |
| Structure 4 (along 0° direction)   | AC stacking     | AA'     | AA'     |
| Structure 5 (along 0° direction)   | AC stacking     | AA''    | AA''    |
| Structure 2 (along 30° direction)  | AC stacking     | AA'     | AA'     |
| Structure 3 (along 30° direction)  | AC stacking     | AA''    | AA''    |
| Structure 2 (along 60° direction)  | AC stacking     | AA'     | AA'     |
| Structure 3 (along 60° direction)  | AC stacking     | AA'     | AA'     |
| Structure 4 (along 60° direction)  | AC stacking     | AB'     | AB'     |
| Structure 5 (along 60° direction)  | AC stacking     | twisted | twisted |
| Structure 2 (along 90° direction)  | AC stacking     | twisted | twisted |
| Structure 3 (along 90° direction)  | AC stacking     | twisted | twisted |
| Structure 2 (along 120° direction) | AC stacking     | AB'     | AB'     |
| Structure 3 (along 120° direction) | AC stacking     | AA'     | AA'     |
| Structure 4 (along 120° direction) | AC stacking     | AA'     | AA'     |
| Structure 5 (along 120° direction) | AC stacking     | AB'     | AB'     |

**Table S3** 60° stacking configurations simulated in our study at minimized state, 300 K and 0.3 K.

| 60° stacking configurations       | Minimized state | 300 K         | 0.3 K         |
|-----------------------------------|-----------------|---------------|---------------|
| Structure 1 (along 0° direction)  | AA' stacking    | AA' stacking  | AA' stacking  |
| Structure 2 (along 0° direction)  | AA' stacking    | AA' stacking  | AA' stacking  |
| Structure 3 (along 0° direction)  | AA' stacking    | AA' stacking  | AA' stacking  |
| Structure 4 (along 0° direction)  | AA' stacking    | AA' stacking  | AA' stacking  |
| Structure 5 (along 0° direction)  | AA' stacking    | AA' stacking  | AA' stacking  |
| Structure 2 (along 30° direction) | AA' stacking    | AA'' stacking | AA'' stacking |
| Structure 3 (along 30° direction) | AA' stacking    | AA' stacking  | AA' stacking  |
| Structure 2 (along 60° direction) | AA' stacking    | twisted       | twisted       |
| Structure 3 (along 60° direction) | AA' stacking    | twisted       | twisted       |
| Structure 4 (along 60° direction) | AA' stacking    | AA' stacking  | AA' stacking  |
| Structure 5 (along 60° direction) | AA' stacking    | AA' stacking  | AA' stacking  |
